# Supplementary material
Source: PubMed Central journal article supplement (PMC8996465)
Supplement: PRO-31-e4307-s001.pdf [file PRO-31-e4307-s001.pdf]

***Supplementary material: Relative domain orientation of the L289K HIV-1 reverse transcriptase monomer***

*Zhaoyong Xi<sup>1, #</sup>, Tatiana V. Ilina<sup>1, #</sup>, Michel Guerrero<sup>1</sup>, Lixin Fan<sup>2</sup>, Nicolas Sluis-Cremer<sup>3</sup>, Yun-Xing Wang<sup>4</sup>, Rieko Ishima<sup>1, \*</sup>.*

<sup>1</sup>Department of Structural Biology, University of Pittsburgh School of Medicine, Pittsburgh, PA 15260, USA.

<sup>2</sup>Basic Science Program, Frederick National Laboratory for Cancer Research, SAXS Core Facility of the National Cancer Institute, Frederick, MD 21702, USA.

<sup>3</sup>Department of Medicine, Division of Infectious Diseases, University of Pittsburgh School of Medicine, Pittsburgh, PA, 15261, USA

<sup>4</sup>Protein-Nucleic Acid Interaction Section, Structural Biophysics Laboratory, National Cancer Institute, National Institutes of Health, Frederick, MD 21702, USA.

Corresponding Author

\* Rieko Ishima, Email: [ishima@pitt.edu](mailto:ishima@pitt.edu)

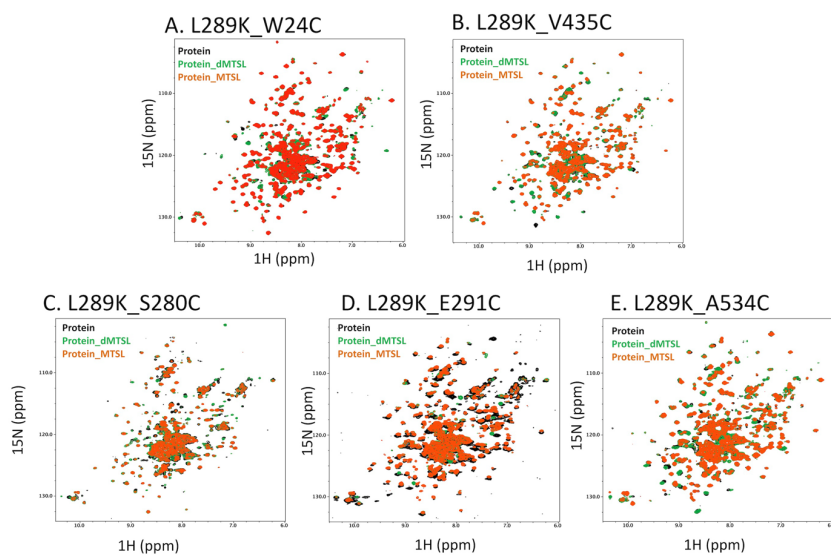

**Figure S1.**  $^1\text{H}$ - $^{15}\text{N}$  TROSY-HSQC spectra of p66<sub>L289K</sub> (black) and with MTSL labeling (red) or diamagnetic-MTSL labeling (green), for (A) p66<sub>L289K/W24C</sub>, (B) p66<sub>L289K/V435C</sub>, (C) p66<sub>L289K/S280C</sub>, (D) p66<sub>L289K/E291C</sub> and (E) p66<sub>L289K/A435C</sub>. MTSL or dMTSL was introduced to the Cys mutation site. To enable only one label in each protein, p66 containing C38V and C280S mutations was used in this study. In case when the spectra are compared with other NMR spectra, note that chemical shift changes occurred by TROSY selection,  $\sim 45$  Hz, was not corrected in these spectra.

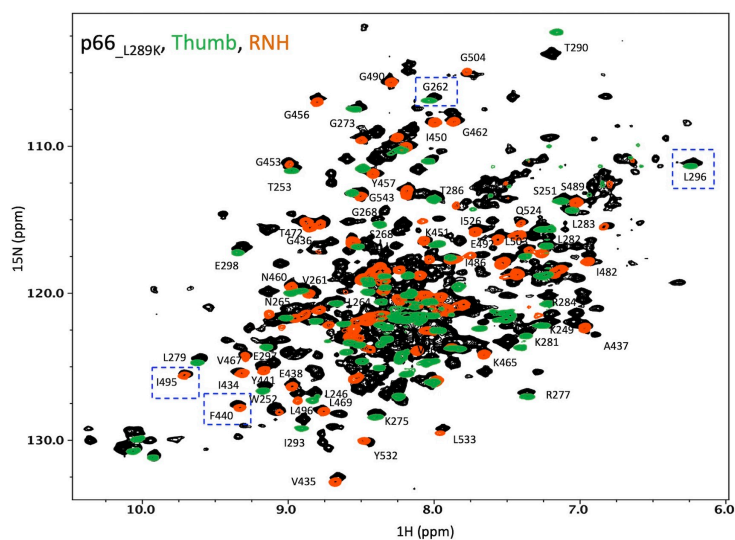

**Figure S2.**  $^1\text{H}$ - $^{15}\text{N}$  TROSY-HSQC spectra of p66<sub>L289K</sub> (black) overlaid with those of the isolated RNH domain (orange) and thumb domain (green) proteins. Qualitative signal assignments were obtained from the spectral overlay (1-3). Residues used for the PRE analysis are labeled. Blue dashed-rectangles indicate residues shown in Figure 2.

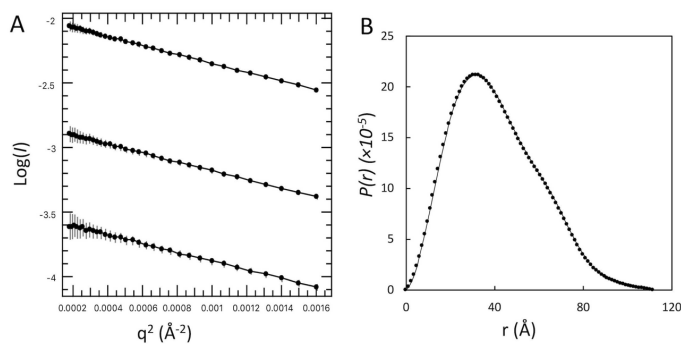

**Figure S3.** SAXS (A) Guinier plots for 1.0, 2.0 and 4.3 mg/mL and (B) the normalized pair-distance distribution function for p66<sub>L289Ktr</sub>. In (A), the log of scattering intensity ( $I$ ) is plotted against the scattering vector  $q$ . In (B), the pair-distance distribution,  $P(r)$ , is plotted against distance,  $r$ . Detailed data for the radius of gyration and the maximum size of the protein are described in **Table 1**.

**Figure S4.** Plots of PRE, as  $I^{para}/I^{dia}$ , for residues in the thumb and RNH domains in p66<sub>L289K</sub>. Black bars are those residues for which intensity ratios were obtained, while grey bars indicate residues with  $I^{para}$  of almost zero. Resonances were qualitatively assigned based on the spectral overlay in **Figure S2**. Residues that overlap with other resonances in p66<sub>L289K</sub>, such as those in the mobile region, could not be assigned in this analysis. Red arrows indicate the sites to which MTSL-tag was attached.

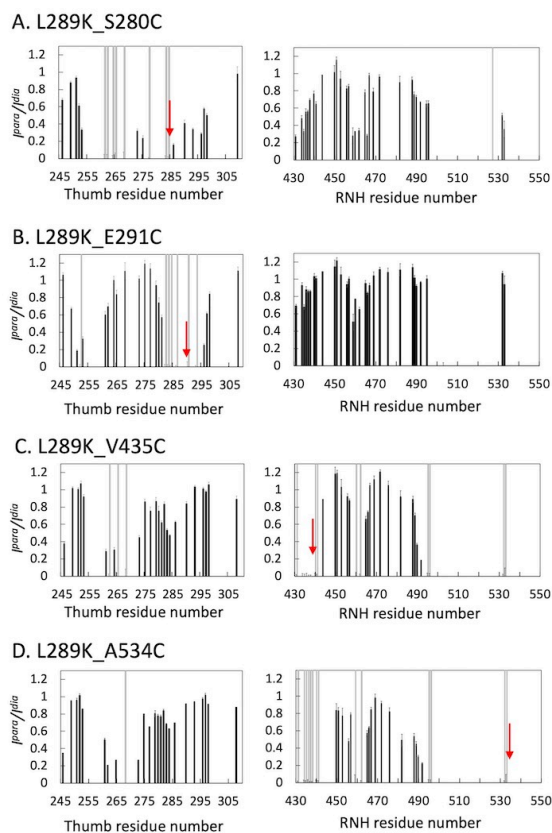

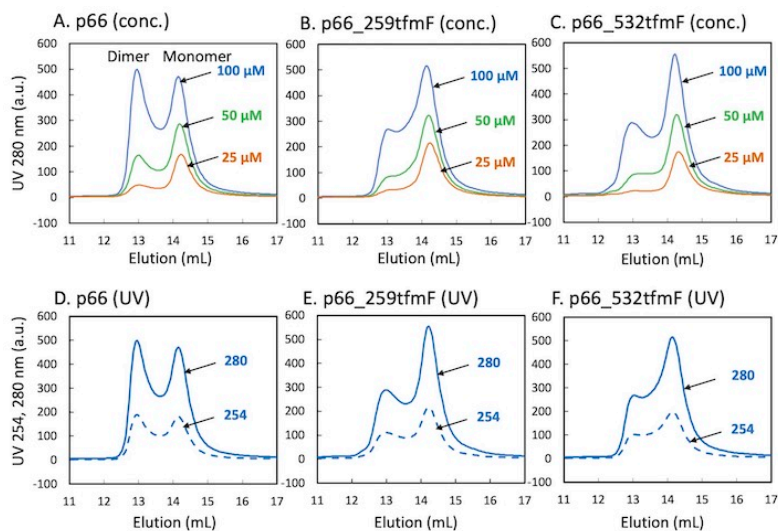

**Figure S5.** SEC elution profiles of (A) p66 and (B, C) 4-trifluoromethyl phenylalanine (tfmF) p66 with the label at (B) residue 259 or (C) residue 532 site, at protein concentrations, 25  $\mu$ M (orange), 50  $\mu$ M (green) and 100  $\mu$ M (blue), and (D-F) comparison of detection at UV 254 nm and UV 280 nm for the 100  $\mu$ M data. SEC was run using a 24-ml analytical Superdex 200 Increase 10/300 GL column (GE Healthcare), equilibrated with a 25 mM Bis-tris buffer, pH 7.0, containing 100 mM NaCl with 0.02% sodium azide, at a flow rate of 0.5 ml/min. In each experiment, a 60  $\mu$ L sample was injected, and protein elution was monitored by UV absorbance at 254 and 280 nm. Empirically,  $\times 10$  fold dilution in the column is expected from those of the injected protein concentrations. Panels D-F are shown to verify that the purified proteins were not contaminated by nucleic acids.

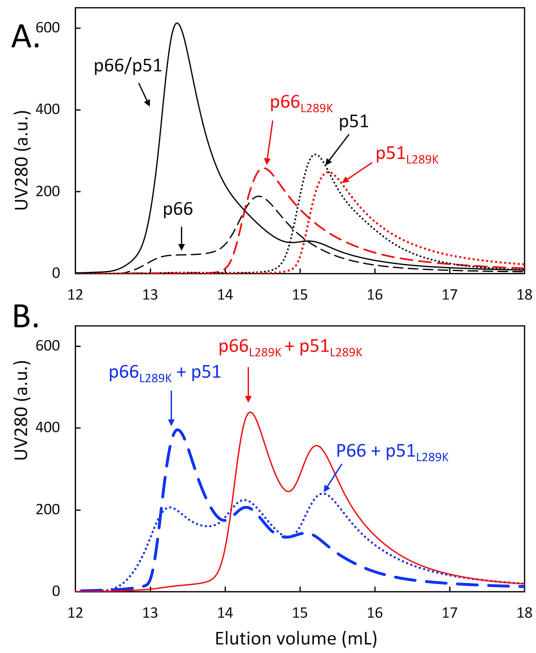

**Figure S6.** SEC elution profiles of (A) p66/p51 (black solid line), p66 (black dashed line), p51 (black dotted line), p66<sub>L289K</sub> (red dashed line) and p51<sub>L289K</sub> (red dotted line), and (B) of a mixture of p66<sub>L289K</sub> and p51<sub>L289K</sub> (red solid line), p66<sub>L289K</sub> and p51 (blue dashed line) and p66 and p51<sub>L289K</sub> (blue dotted line). Proteins were prepared in a 25 mM Bis-tris buffer, pH 7.0, containing 100 mM NaCl with 0.02% sodium azide, at 30  $\mu$ M concentration, mixed. 80 $\mu$ L volume was injected each time.

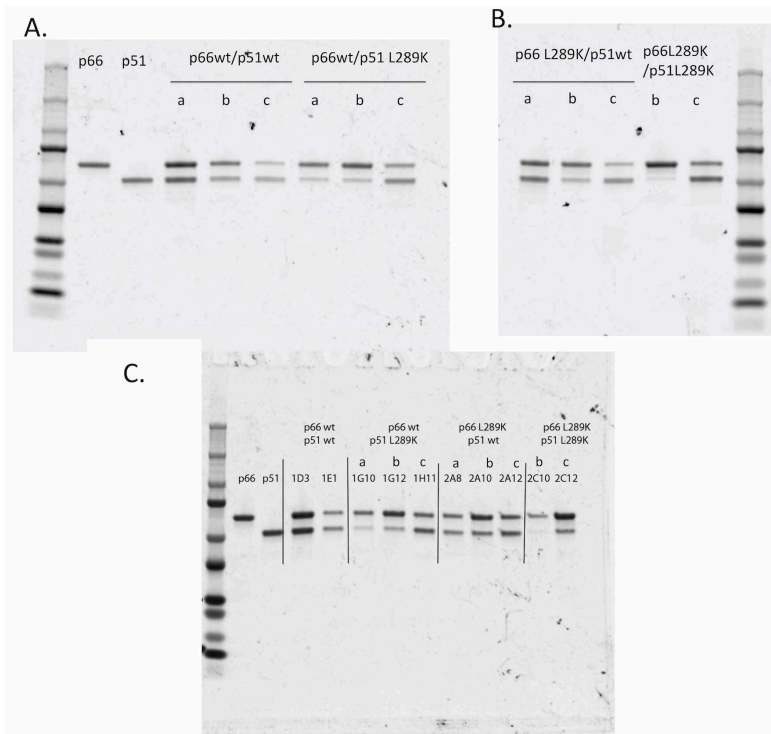

**Figure S7.** (A, B) the entire SDS gel shown in Figure 5C, indicating that there are no smaller degradation bands, and (C) repeated data.

**Table S1.** Molecular masses of the elution peaks at position **a** in the SEC in Figure 5.

| Sample             | Detected | Theoretical | Protein                                  |
|--------------------|----------|-------------|------------------------------------------|
| p66 WT + p51 WT    | 65537.36 | 65538.27    | p66 WT                                   |
|                    | 52595.40 | 52596.60    | p51 WT                                   |
| p66 WT + p51 L289K | 65536.64 | 65538.27    | p66 WT                                   |
|                    | 63631.96 | 63634.10    | Cleavage after denaturation <sup>a</sup> |
|                    | 63291.67 | 63293.64    | Cleavage by formic acid <sup>b</sup>     |
|                    | 52610.00 | 52611.61    | p51 L289K                                |
| p66 L289K + p51 WT | 65552.49 | 65553.29    | p66 L289K                                |
|                    | 63307.52 | 63308.65    | Cleavage by formic acid <sup>b</sup>     |
|                    | 52594.98 | 52596.60    | p51 WT                                   |

- We observed protease-cleaved fraction in the mass spec data. Since we do not see this band in the SDS gel, we conclude that the fragmentation happened in the column applied for the mass spectrometry.
- Chemical cleavage by formic acid for denaturation to acquire mass spec data.

**Table S2.** Selected mass spectrometry results to identify the samples prepared for this study.

| proteins for SAXS and PRE                                                           |                                      |               |                  |
|-------------------------------------------------------------------------------------|--------------------------------------|---------------|------------------|
| Date_#                                                                              | Proteins                             | Measured (Da) | Theoretical (Da) |
| 190423_1                                                                            | p66 (N-terminal His, cleaved)        | 64906.8027    | 64905.64         |
| 190522_1                                                                            | p66(1-556) (N-terminal His, cleaved) | 64411.6646    | 64409.98         |
| proteins for NMR - with C-terminal His to avoid truncation by TAG for tfmF labeling |                                      |               |                  |
| Date_#                                                                              | Proteins                             | Measured (Da) | Theoretical (Da) |
| 210618_1                                                                            | p66 (C-terminal his)                 | 65539.3935    | 65538.27         |
| 210521_1                                                                            | p66_259_tfmF                         | 65628.0941    | 65625.27         |
| 180327_2                                                                            | p66_532_tfmF                         | 65590.9873    | 65590.27         |
| 210819_1                                                                            | p66_L289K                            | 65551.6278    | 65553.29         |
| 201106_1                                                                            | p66_L289K_259_tfmF                   | 65641.3709    | 65640.29         |
| 180403_1                                                                            | p66_L289K_532_tfmF                   | 65604.3588    | 65605.29         |
| p51 proteins for NMR - with N-terminal Strep to separately select p51 from p66.     |                                      |               |                  |
| 210728_1                                                                            | p51                                  | 52595.3582    | 52596.6          |
| 210726_1                                                                            | p51_L289K                            | 52610.7329    | 52611.61         |

## References

- Pari K, Mueller GA, DeRose EF, Kirby TW, London RE. (2003) Solution structure of the RNase H domain of the HIV-1 reverse transcriptase in the presence of magnesium. *Biochemistry*. 42(3):639-50.
- Sharaf NG, Poliner E, Slack RL, Christen MT, Byeon IJ, Parniak MA, et al. (2014) The p66 immature precursor of HIV-1 reverse transcriptase. *Proteins*. 82(10):2343-52.
- Sharaf NG, Brereton AE, Byeon IL, Andrew Karplus P, Gronenborn AM. (2016) NMR structure of the HIV-1 reverse transcriptase thumb subdomain. *J Biomol NMR*.
